# Supplementary material for: Expression Analysis of the Prolific Candidate Genes, BMPR1B, BMP15, and GDF9 in Small Tail Han Ewes with Three Fecundity (FecB Gene) Genotypes
Source: MDPI journal article supplement (doi:10.3390/ani8100166), 2018-09-28

## Supplement Fig. S1-S4: Standard Curve of target gene

Fig.s1: Standard Curve of  $\beta$ -actin gene

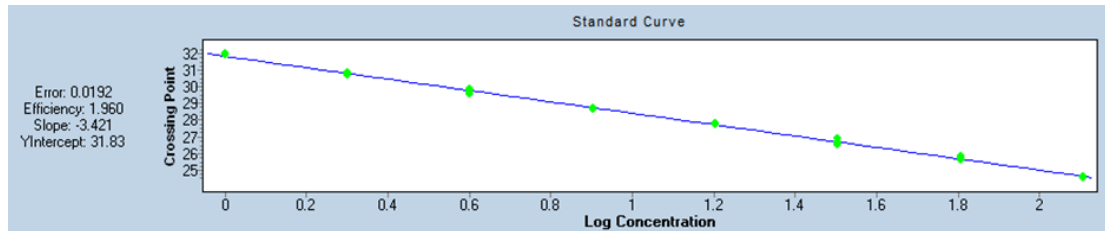

Fig.s2: Standard Curve of *BMPR1B* gene

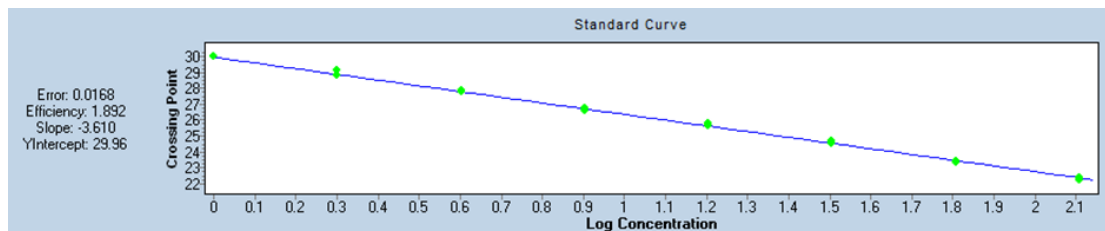

Fig.s3: Standard Curve of *BMP15* gene

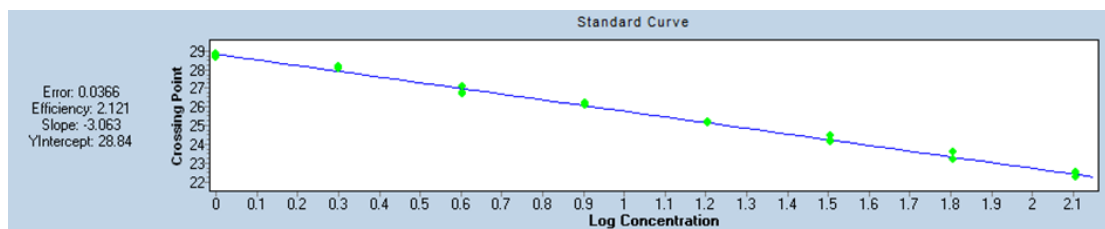

Fig. s4: Standard Curve of *GDF9* gene

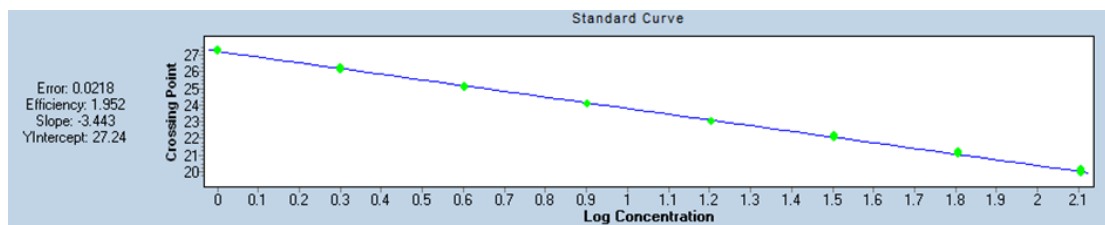

Supplement: s1 [file s1]
